# Supplementary material for: Transcriptomic Landscape of Lower Grade Glioma Based on Age-Related Non-Silent Somatic Mutations
Source: MDPI journal article supplement (doi:10.3390/curroncol28030210), 2021-06-19
Supplement: s1 [file s1]

Table S1. The results of logistic regression with gene mutations of which frequency is over 5 percent and age in the lower grade glioma. OR is odds ratio. 2.50% and 97.50% is boundary value of 95 percent confidence interval.

| Gene          | OR   | 2.50% | 97.50% | <i>p-value</i> |
|---------------|------|-------|--------|----------------|
| <i>IDH1</i>   | 0.95 | 0.94  | 0.97   | 0              |
| <i>TP53</i>   | 0.95 | 0.93  | 0.96   | 0              |
| <i>ATRX</i>   | 0.95 | 0.93  | 0.96   | 0              |
| <i>CIC</i>    | 1.01 | 1     | 1.03   | 0.103          |
| <i>TTN</i>    | 1.03 | 1.01  | 1.05   | 0.01           |
| <i>FUBP1</i>  | 1.03 | 1     | 1.05   | 0.017          |
| <i>PIK3CA</i> | 1.02 | 0.99  | 1.04   | 0.136          |
| <i>NOTCH1</i> | 1.02 | 1     | 1.05   | 0.099          |
| <i>MUC16</i>  | 1    | 0.97  | 1.02   | 0.82           |
| <i>EGFR</i>   | 1.1  | 1.07  | 1.13   | 0              |
| <i>NF1</i>    | 1.03 | 1.01  | 1.06   | 0.019          |

Table S2. The results of logistic regression with gene mutations of which frequency is over 5 percent and age in the glioblastoma. OR is odds ratio. 2.50% and 97.50% is boundary value of 95 percent confidence interval.

| Gene          | OR   | 95% CI (Lower) | 95% CI (Upper) | <i>p-value</i> |
|---------------|------|----------------|----------------|----------------|
| <i>TP53</i>   | 0.98 | 0.96           | 1.01           | 0.165          |
| <i>PTEN</i>   | 1.02 | 0.99           | 1.05           | 0.14           |
| <i>EGFR</i>   | 1    | 0.97           | 1.03           | 0.929          |
| <i>TTN</i>    | 0.99 | 0.96           | 1.01           | 0.305          |
| <i>MUC16</i>  | 0.98 | 0.95           | 1.02           | 0.368          |
| <i>SPTA1</i>  | 1.01 | 0.98           | 1.06           | 0.472          |
| <i>NF1</i>    | 1    | 0.96           | 1.04           | 0.855          |
| <i>RYR2</i>   | 0.98 | 0.95           | 1.02           | 0.397          |
| <i>OBSCN</i>  | 0.95 | 0.91           | 0.99           | 0.013          |
| <i>PIK3CA</i> | 0.99 | 0.95           | 1.03           | 0.633          |
| <i>RB1</i>    | 0.99 | 0.95           | 1.03           | 0.509          |
| <i>FLG</i>    | 0.98 | 0.94           | 1.02           | 0.253          |
| <i>AHNAK2</i> | 0.98 | 0.94           | 1.02           | 0.262          |
| <i>PIK3R1</i> | 0.99 | 0.95           | 1.03           | 0.558          |
| <i>PCLO</i>   | 0.98 | 0.94           | 1.02           | 0.288          |
| <i>MUC17</i>  | 1    | 0.96           | 1.05           | 0.907          |
| <i>HYDIN</i>  | 0.98 | 0.94           | 1.03           | 0.458          |
| <i>KEL</i>    | 1.01 | 0.97           | 1.07           | 0.635          |
| <i>ATRX</i>   | 0.88 | 0.82           | 0.93           | 0              |
| <i>DNAH17</i> | 0.97 | 0.93           | 1.02           | 0.277          |
| <i>DNAH5</i>  | 0.99 | 0.95           | 1.04           | 0.788          |
| <i>PKHD1</i>  | 1.01 | 0.96           | 1.07           | 0.649          |
| <i>DOCK5</i>  | 0.97 | 0.93           | 1.02           | 0.258          |
| <i>COL6A3</i> | 1.01 | 0.96           | 1.07           | 0.625          |
| <i>SYNE1</i>  | 1    | 0.95           | 1.06           | 0.987          |
| <i>GPR98</i>  | 0.95 | 0.91           | 1              | 0.051          |
| <i>APOB</i>   | 0.99 | 0.94           | 1.04           | 0.648          |
| <i>CALN1</i>  | 0.99 | 0.94           | 1.05           | 0.745          |
| <i>SEMA3C</i> | 1.01 | 0.96           | 1.07           | 0.589          |
| <i>VWF</i>    | 0.97 | 0.92           | 1.02           | 0.259          |
| <i>COL1A2</i> | 0.97 | 0.92           | 1.02           | 0.17           |
| <i>GRM3</i>   | 0.97 | 0.92           | 1.02           | 0.27           |
| <i>USH2A</i>  | 0.96 | 0.92           | 1.02           | 0.154          |
| <i>MROH2B</i> | 1    | 0.95           | 1.06           | 0.956          |
| <i>SLIT3</i>  | 0.97 | 0.92           | 1.02           | 0.179          |
| <i>TCHH</i>   | 0.98 | 0.93           | 1.03           | 0.348          |

|                |      |      |      |       |
|----------------|------|------|------|-------|
| <i>ARHGEF5</i> | 0.95 | 0.91 | 1    | 0.07  |
| <i>RYR3</i>    | 0.97 | 0.93 | 1.03 | 0.321 |

---

**Table S4** Multiple logistic regression analysis between age and age-dependent somatic mutations with adjusted gender and KPS

| subtype | Gene | Disturbance variable        | OR    | 95% CI (Lower) | 95% CI(Upper) | p-value  |
|---------|------|-----------------------------|-------|----------------|---------------|----------|
| LGG     | IDH1 | karnofsky performance score | 0.953 | 0.945          | 0.961         | 1.33E-09 |
|         |      | gender                      | 0.992 | 0.990          | 0.993         | 1.34E-09 |
|         | ATRX | karnofsky performance score | 0.949 | 0.941          | 0.957         | 4.25E-12 |
|         |      | gender                      | 0.949 | 0.942          | 0.957         | 4.02E-12 |
|         | TP53 | karnofsky performance score | 0.947 | 0.940          | 0.955         | 4.15E-14 |
|         |      | gender                      | 0.948 | 0.941          | 0.955         | 5.44E-14 |
|         | EGFR | karnofsky performance score | 1.099 | 1.082          | 1.116         | 2.36E-12 |
|         |      | gender                      | 1.099 | 1.082          | 1.116         | 2.38E-12 |
| GBM     | ATRX | karnofsky performance score | 0.876 | 0.847          | 0.906         | 1.58E-07 |
|         |      | gender                      | 0.879 | 0.851          | 0.908         | 6.18E-08 |

OR; Odds ratio, CI; Confidence interval

Table S5. The log-rank *p-value* in Grade and IDH1 mutation. Grade compares groups of IDH1 mutation and IDH1 wild-type in each grade. Mutation compares groups of grades in IDH1 mutation and IDH1 wild-type

|                         | Grade     |          |          | Mutation              |                      |
|-------------------------|-----------|----------|----------|-----------------------|----------------------|
|                         | G2        | G3       | G4       | <i>IDH1</i> wild-type | <i>IDH1</i> mutation |
| Log-rank <i>p-value</i> | 0.0023443 | 9.50E-12 | 0.015408 | 3.30E-13              | 1.95E-08             |

Table S6. The results of multi-label feature selection information gain of IDH1 and grade

| Gene            | Clusters |  |
|-----------------|----------|--|
| <i>ACAA2</i>    | 1        |  |
| <i>ADAM12</i>   | 1        |  |
| <i>ALG3</i>     | 1        |  |
| <i>ANKRD53</i>  | 1        |  |
| <i>ANXA1</i>    | 1        |  |
| <i>ANXA2</i>    | 1        |  |
| <i>ANXA2P1</i>  | 1        |  |
| <i>ANXA2P2</i>  | 1        |  |
| <i>ANXA5</i>    | 1        |  |
| <i>AQP5</i>     | 1        |  |
| <i>ARAP3</i>    | 1        |  |
| <i>ARL9</i>     | 1        |  |
| <i>ARSD</i>     | 1        |  |
| <i>ASF1B</i>    | 1        |  |
| <i>ATP5EP2</i>  | 1        |  |
| <i>ATP6V1C2</i> | 1        |  |
| <i>AURKA</i>    | 1        |  |
| <i>B3GNT5</i>   | 1        |  |
| <i>B3GNT7</i>   | 1        |  |
| <i>BCL2L12</i>  | 1        |  |
| <i>BGN</i>      | 1        |  |
| <i>BOLA3</i>    | 1        |  |
| <i>BUB1</i>     | 1        |  |
| <i>BZW1</i>     | 1        |  |
| <i>C11orf63</i> | 1        |  |
| <i>C12orf48</i> | 1        |  |
| <i>C1orf85</i>  | 1        |  |
| <i>C2orf28</i>  | 1        |  |
| <i>C5orf35</i>  | 1        |  |
| <i>C5orf62</i>  | 1        |  |
| <i>C6orf115</i> | 1        |  |
| <i>C9orf64</i>  | 1        |  |
| <i>CA3</i>      | 1        |  |
| <i>CALU</i>     | 1        |  |
| <i>CAPZA1</i>   | 1        |  |
| <i>CASP3</i>    | 1        |  |
| <i>CASP4</i>    | 1        |  |
| <i>CASP6</i>    | 1        |  |

|                 |   |
|-----------------|---|
| <i>CCDC109B</i> | 1 |
| <i>CCDC8</i>    | 1 |
| <i>CCNA2</i>    | 1 |
| <i>CCNB1</i>    | 1 |
| <i>CCNB2</i>    | 1 |
| <i>CCNYL1</i>   | 1 |
| <i>CD101</i>    | 1 |
| <i>CD151</i>    | 1 |
| <i>CD248</i>    | 1 |
| <i>CD276</i>    | 1 |
| <i>CD58</i>     | 1 |
| <i>CD63</i>     | 1 |
| <i>CD97</i>     | 1 |
| <i>CDC20</i>    | 1 |
| <i>CDCA8</i>    | 1 |
| <i>CDK2</i>     | 1 |
| <i>CDKN3</i>    | 1 |
| <i>CENPA</i>    | 1 |
| <i>CENPK</i>    | 1 |
| <i>CENPL</i>    | 1 |
| <i>CEP55</i>    | 1 |
| <i>CHI3L1</i>   | 1 |
| <i>CKLF</i>     | 1 |
| <i>CKS1B</i>    | 1 |
| <i>CKS2</i>     | 1 |
| <i>CLIC1</i>    | 1 |
| <i>CNIH4</i>    | 1 |
| <i>COL4A1</i>   | 1 |
| <i>COL5A2</i>   | 1 |
| <i>DAP</i>      | 1 |
| <i>DCTD</i>     | 1 |
| <i>DDB2</i>     | 1 |
| <i>DDOST</i>    | 1 |
| <i>DEDD2</i>    | 1 |
| <i>DEPDC1</i>   | 1 |
| <i>DMRTA2</i>   | 1 |
| <i>DPYD</i>     | 1 |
| <i>E2F7</i>     | 1 |
| <i>ECT2</i>     | 1 |
| <i>EDARADD</i>  | 1 |
| <i>EDEM2</i>    | 1 |

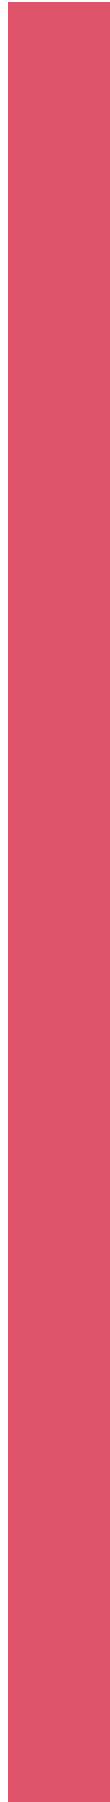

|                  |   |
|------------------|---|
| <i>EFEMP2</i>    | 1 |
| <i>EMP3</i>      | 1 |
| <i>EPR1</i>      | 1 |
| <i>EVC2</i>      | 1 |
| <i>F11R</i>      | 1 |
| <i>FAM109B</i>   | 1 |
| <i>FAM176B</i>   | 1 |
| <i>FBXO17</i>    | 1 |
| <i>FBXO39</i>    | 1 |
| <i>FKBP9</i>     | 1 |
| <i>FMOD</i>      | 1 |
| <i>FSTL1</i>     | 1 |
| <i>FUCA2</i>     | 1 |
| <i>G0S2</i>      | 1 |
| <i>GDF15</i>     | 1 |
| <i>GGH</i>       | 1 |
| <i>GJC1</i>      | 1 |
| <i>GLA</i>       | 1 |
| <i>GLB1</i>      | 1 |
| <i>GNG12</i>     | 1 |
| <i>GPN1</i>      | 1 |
| <i>GPR1</i>      | 1 |
| <i>GPX7</i>      | 1 |
| <i>GPX8</i>      | 1 |
| <i>GSTK1</i>     | 1 |
| <i>GUSB</i>      | 1 |
| <i>HAUS1</i>     | 1 |
| <i>HDAC3</i>     | 1 |
| <i>HDHD3</i>     | 1 |
| <i>HEBP2</i>     | 1 |
| <i>HEXB</i>      | 1 |
| <i>HFE</i>       | 1 |
| <i>HIST1H2BH</i> | 1 |
| <i>HJURP</i>     | 1 |
| <i>HOTAIR</i>    | 1 |
| <i>HOXA1</i>     | 1 |
| <i>HOXA2</i>     | 1 |
| <i>HOXA3</i>     | 1 |
| <i>HOXA5</i>     | 1 |
| <i>HOXB3</i>     | 1 |
| <i>HOXC10</i>    | 1 |

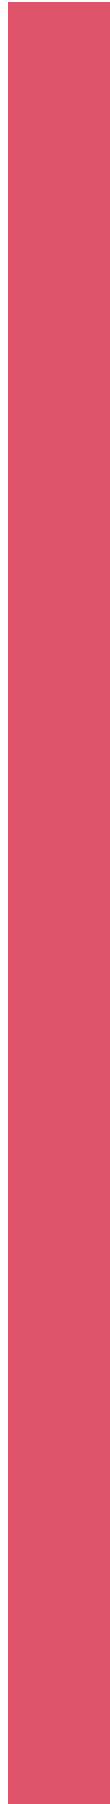



|                     |   |
|---------------------|---|
| <i>IFNGR2</i>       | 1 |
| <i>IGF2BP3</i>      | 1 |
| <i>IGFBP2</i>       | 1 |
| <i>IKBIP</i>        | 1 |
| <i>ITGA5</i>        | 1 |
| <i>KDELC2</i>       | 1 |
| <i>KDELR1</i>       | 1 |
| <i>KDELR2</i>       | 1 |
| <i>KDELR3</i>       | 1 |
| <i>KIAA0101</i>     | 1 |
| <i>KIAA0495</i>     | 1 |
| <i>KIF20A</i>       | 1 |
| <i>KIF23</i>        | 1 |
| <i>KIF4A</i>        | 1 |
| <i>KPNA2</i>        | 1 |
| <i>LAMC1</i>        | 1 |
| <i>LATS2</i>        | 1 |
| <i>LDHA</i>         | 1 |
| <i>LEPRE1</i>       | 1 |
| <i>LGALS1</i>       | 1 |
| <i>LGALS3</i>       | 1 |
| <i>LOC100130776</i> | 1 |
| <i>LOC284276</i>    | 1 |
| <i>LOC407835</i>    | 1 |
| <i>LOC493754</i>    | 1 |
| <i>LOC541471</i>    | 1 |
| <i>LOC647946</i>    | 1 |
| <i>LOX</i>          | 1 |
| <i>LOXL1</i>        | 1 |
| <i>LSP1</i>         | 1 |
| <i>LYPLA1</i>       | 1 |
| <i>MAP1LC3C</i>     | 1 |
| <i>MARVELD1</i>     | 1 |
| <i>MDK</i>          | 1 |
| <i>MED8</i>         | 1 |
| <i>MELK</i>         | 1 |
| <i>MEOX2</i>        | 1 |
| <i>METTL7B</i>      | 1 |
| <i>MIR155HG</i>     | 1 |
| <i>MLX</i>          | 1 |
| <i>MMP11</i>        | 1 |

|                   |   |  |
|-------------------|---|--|
| <i>MSN</i>        | 1 |  |
| <i>MYD88</i>      | 1 |  |
| <i>MYL12A</i>     | 1 |  |
| <i>NANP</i>       | 1 |  |
| <i>NCRNA00152</i> | 1 |  |
| <i>NNMT</i>       | 1 |  |
| <i>NOX4</i>       | 1 |  |
| <i>NSUN7</i>      | 1 |  |
| <i>NTAN1</i>      | 1 |  |
| <i>NUP37</i>      | 1 |  |
| <i>OCIAD2</i>     | 1 |  |
| <i>OSTC</i>       | 1 |  |
| <i>OTP</i>        | 1 |  |
| <i>PA2G4P4</i>    | 1 |  |
| <i>PCNA</i>       | 1 |  |
| <i>PCOLCE</i>     | 1 |  |
| <i>PDIA3P</i>     | 1 |  |
| <i>PDIA4</i>      | 1 |  |
| <i>PDIA6</i>      | 1 |  |
| <i>PDLIM1</i>     | 1 |  |
| <i>PDLIM4</i>     | 1 |  |
| <i>PDPN</i>       | 1 |  |
| <i>PGCP</i>       | 1 |  |
| <i>PION</i>       | 1 |  |
| <i>PLA2G2A</i>    | 1 |  |
| <i>PLAT</i>       | 1 |  |
| <i>PLAUR</i>      | 1 |  |
| <i>PLEK2</i>      | 1 |  |
| <i>PLP2</i>       | 1 |  |
| <i>PMM2</i>       | 1 |  |
| <i>PMS2L2</i>     | 1 |  |
| <i>POC1A</i>      | 1 |  |
| <i>POLR1D</i>     | 1 |  |
| <i>POSTN</i>      | 1 |  |
| <i>PPCS</i>       | 1 |  |
| <i>PPIA</i>       | 1 |  |
| <i>PPIC</i>       | 1 |  |
| <i>PPIL5</i>      | 1 |  |
| <i>PPPDE1</i>     | 1 |  |
| <i>PRDX4</i>      | 1 |  |
| <i>PRICKLE3</i>   | 1 |  |

|                 |   |
|-----------------|---|
| <i>PRPS2</i>    | 1 |
| <i>PSMC2</i>    | 1 |
| <i>PSRC1</i>    | 1 |
| <i>PTGFRN</i>   | 1 |
| <i>PTTG1</i>    | 1 |
| <i>PTX3</i>     | 1 |
| <i>PVT1</i>     | 1 |
| <i>PYGL</i>     | 1 |
| <i>RAB32</i>    | 1 |
| <i>RAB34</i>    | 1 |
| <i>RAB36</i>    | 1 |
| <i>RAB42</i>    | 1 |
| <i>RABL5</i>    | 1 |
| <i>RAD54B</i>   | 1 |
| <i>RAET1K</i>   | 1 |
| <i>RAP1B</i>    | 1 |
| <i>RARRES2</i>  | 1 |
| <i>RARS</i>     | 1 |
| <i>RBP1</i>     | 1 |
| <i>RFC2</i>     | 1 |
| <i>RINL</i>     | 1 |
| <i>RPA3</i>     | 1 |
| <i>RPS2P32</i>  | 1 |
| <i>RRM2</i>     | 1 |
| <i>S100A4</i>   | 1 |
| <i>SAA1</i>     | 1 |
| <i>SDF4</i>     | 1 |
| <i>SEC24D</i>   | 1 |
| <i>SEC61G</i>   | 1 |
| <i>SERPINH1</i> | 1 |
| <i>SH2D4A</i>   | 1 |
| <i>SHOX2</i>    | 1 |
| <i>SHQ1</i>     | 1 |
| <i>SKA1</i>     | 1 |
| <i>SLC25A24</i> | 1 |
| <i>SLC27A3</i>  | 1 |
| <i>SLC2A10</i>  | 1 |
| <i>SLC35A2</i>  | 1 |
| <i>SLC43A3</i>  | 1 |
| <i>SMC4</i>     | 1 |
| <i>SPAG4</i>    | 1 |

|                  |   |
|------------------|---|
| <i>SPON2</i>     | 1 |
| <i>SPRY1</i>     | 1 |
| <i>STAC</i>      | 1 |
| <i>STEAP3</i>    | 1 |
| <i>SUMO1P3</i>   | 1 |
| <i>TAGLN2</i>    | 1 |
| <i>TBL2</i>      | 1 |
| <i>TCEA3</i>     | 1 |
| <i>TEAD3</i>     | 1 |
| <i>TGIF1</i>     | 1 |
| <i>TICAM2</i>    | 1 |
| <i>TIMP1</i>     | 1 |
| <i>TMBIM1</i>    | 1 |
| <i>TMEM106C</i>  | 1 |
| <i>TMEM159</i>   | 1 |
| <i>TMEM165</i>   | 1 |
| <i>TMEM214</i>   | 1 |
| <i>TMEM60</i>    | 1 |
| <i>TMEM71</i>    | 1 |
| <i>TMSB10</i>    | 1 |
| <i>TMSL3</i>     | 1 |
| <i>TNFAIP6</i>   | 1 |
| <i>TNFRSF11B</i> | 1 |
| <i>TNFRSF12A</i> | 1 |
| <i>TOM1L1</i>    | 1 |
| <i>TPM4</i>      | 1 |
| <i>TTC26</i>     | 1 |
| <i>TTYH3</i>     | 1 |
| <i>TUBA1C</i>    | 1 |
| <i>TXNDC5</i>    | 1 |
| <i>TYMS</i>      | 1 |
| <i>UBE2A</i>     | 1 |
| <i>UBE2MP1</i>   | 1 |
| <i>ULBP3</i>     | 1 |
| <i>VASN</i>      | 1 |
| <i>VAV3</i>      | 1 |
| <i>WEE1</i>      | 1 |
| <i>XKR8</i>      | 1 |
| <i>YIPF1</i>     | 1 |
| <i>ZCCHC9</i>    | 1 |
| <i>ZNF90</i>     | 1 |

|                 |   |
|-----------------|---|
| <i>AARS</i>     | 2 |
| <i>ABI1</i>     | 2 |
| <i>ABLIM1</i>   | 2 |
| <i>ACBD5</i>    | 2 |
| <i>ACVR2B</i>   | 2 |
| <i>AKAP6</i>    | 2 |
| <i>ALCAM</i>    | 2 |
| <i>ALDH2</i>    | 2 |
| <i>ALDH5A1</i>  | 2 |
| <i>ANKRD16</i>  | 2 |
| <i>ANKRD26</i>  | 2 |
| <i>ARPP21</i>   | 2 |
| <i>ASB13</i>    | 2 |
| <i>ATP6V1G2</i> | 2 |
| <i>ATP9A</i>    | 2 |
| <i>BEND7</i>    | 2 |
| <i>BMP2</i>     | 2 |
| <i>BRD7</i>     | 2 |
| <i>C10orf4</i>  | 2 |
| <i>C5orf53</i>  | 2 |
| <i>CBARA1</i>   | 2 |
| <i>CDC26</i>    | 2 |
| <i>CDH20</i>    | 2 |
| <i>CDHR1</i>    | 2 |
| <i>CPEB3</i>    | 2 |
| <i>CRTAC1</i>   | 2 |
| <i>CSDC2</i>    | 2 |
| <i>CSMD3</i>    | 2 |
| <i>CYTH1</i>    | 2 |
| <i>DDX42</i>    | 2 |
| <i>DGCR2</i>    | 2 |
| <i>DHTKD1</i>   | 2 |
| <i>DIP2C</i>    | 2 |
| <i>DNAJB12</i>  | 2 |
| <i>DNAJC12</i>  | 2 |
| <i>DNM3</i>     | 2 |
| <i>DSCAML1</i>  | 2 |
| <i>DST</i>      | 2 |
| <i>DUSP26</i>   | 2 |
| <i>DYNC1H1</i>  | 2 |
| <i>EEF1A1P9</i> | 2 |

|                  |   |
|------------------|---|
| <i>FAM133A</i>   | 2 |
| <i>FAM171A1</i>  | 2 |
| <i>FAM190B</i>   | 2 |
| <i>FAM192A</i>   | 2 |
| <i>FAM21C</i>    | 2 |
| <i>FAM71D</i>    | 2 |
| <i>FBXO18</i>    | 2 |
| <i>FCHSD2</i>    | 2 |
| <i>FLRT1</i>     | 2 |
| <i>FOXO3B</i>    | 2 |
| <i>FOXO4</i>     | 2 |
| <i>FRY</i>       | 2 |
| <i>FTHL3</i>     | 2 |
| <i>GALNT13</i>   | 2 |
| <i>GCSH</i>      | 2 |
| <i>GLUD1</i>     | 2 |
| <i>GUSBL1</i>    | 2 |
| <i>H2AFY2</i>    | 2 |
| <i>H3F3C</i>     | 2 |
| <i>HDAC4</i>     | 2 |
| <i>HDAC5</i>     | 2 |
| <i>HERC1</i>     | 2 |
| <i>HIPK2</i>     | 2 |
| <i>HMX1</i>      | 2 |
| <i>HNRNPA3P1</i> | 2 |
| <i>HNRNPH3</i>   | 2 |
| <i>HNRNPUL2</i>  | 2 |
| <i>JMY</i>       | 2 |
| <i>JPH3</i>      | 2 |
| <i>JPH4</i>      | 2 |
| <i>KCNB1</i>     | 2 |
| <i>KCNIP3</i>    | 2 |
| <i>KIAA0427</i>  | 2 |
| <i>KIAA0430</i>  | 2 |
| <i>KIAA1279</i>  | 2 |
| <i>LARP4B</i>    | 2 |
| <i>LOC254559</i> | 2 |
| <i>LOC339674</i> | 2 |
| <i>LOC341056</i> | 2 |
| <i>LOC399744</i> | 2 |
| <i>LOC442454</i> | 2 |

|                   |   |
|-------------------|---|
| <i>LOC643387</i>  | 2 |
| <i>LOC644936</i>  | 2 |
| <i>LOC728643</i>  | 2 |
| <i>LRIT2</i>      | 2 |
| <i>LRRC37A4</i>   | 2 |
| <i>MAPT</i>       | 2 |
| <i>MCF2L2</i>     | 2 |
| <i>MGEA5</i>      | 2 |
| <i>MIPOL1</i>     | 2 |
| <i>MLL</i>        | 2 |
| <i>MLLT6</i>      | 2 |
| <i>MTPAP</i>      | 2 |
| <i>MXI1</i>       | 2 |
| <i>MYO18A</i>     | 2 |
| <i>MYST4</i>      | 2 |
| <i>NACA2</i>      | 2 |
| <i>NACAP1</i>     | 2 |
| <i>NALCN</i>      | 2 |
| <i>NAP1L3</i>     | 2 |
| <i>NCAM1</i>      | 2 |
| <i>NCRNA00093</i> | 2 |
| <i>NET1</i>       | 2 |
| <i>NLGN2</i>      | 2 |
| <i>NOG</i>        | 2 |
| <i>NRG3</i>       | 2 |
| <i>NSUN6</i>      | 2 |
| <i>NTNG2</i>      | 2 |
| <i>NUMA1</i>      | 2 |
| <i>OPHN1</i>      | 2 |
| <i>PABPC5</i>     | 2 |
| <i>PCDH15</i>     | 2 |
| <i>PDCD4</i>      | 2 |
| <i>PHLPP1</i>     | 2 |
| <i>PHYHIPL</i>    | 2 |
| <i>PIP4K2B</i>    | 2 |
| <i>PLCB1</i>      | 2 |
| <i>PPIAL4C</i>    | 2 |
| <i>PRLHR</i>      | 2 |
| <i>RABGAP1</i>    | 2 |
| <i>RANBP17</i>    | 2 |
| <i>RASL10A</i>    | 2 |

|                  |   |
|------------------|---|
| <i>RBM17</i>     | 2 |
| <i>REPS2</i>     | 2 |
| <i>RICTOR</i>    | 2 |
| <i>RPL12</i>     | 2 |
| <i>RPL13AP3</i>  | 2 |
| <i>RPL17</i>     | 2 |
| <i>RPL23P8</i>   | 2 |
| <i>RPL7</i>      | 2 |
| <i>RPS27A</i>    | 2 |
| <i>SCAPER</i>    | 2 |
| <i>SH3GL2</i>    | 2 |
| <i>SIRT1</i>     | 2 |
| <i>SLC25A21</i>  | 2 |
| <i>SLC6A10P</i>  | 2 |
| <i>SMC3</i>      | 2 |
| <i>SMOC1</i>     | 2 |
| <i>SOX8</i>      | 2 |
| <i>SPIRE1</i>    | 2 |
| <i>SPTAN1</i>    | 2 |
| <i>SSTR1</i>     | 2 |
| <i>SUFU</i>      | 2 |
| <i>SYT15</i>     | 2 |
| <i>TAPT1</i>     | 2 |
| <i>TARSL2</i>    | 2 |
| <i>TCEAL2</i>    | 2 |
| <i>TEF</i>       | 2 |
| <i>TMOD2</i>     | 2 |
| <i>TNK2</i>      | 2 |
| <i>TNRC6C</i>    | 2 |
| <i>TOM1L2</i>    | 2 |
| <i>TOP1P2</i>    | 2 |
| <i>TRIM8</i>     | 2 |
| <i>TTC3</i>      | 2 |
| <i>TUB</i>       | 2 |
| <i>UPF2</i>      | 2 |
| <i>USP34</i>     | 2 |
| <i>WAC</i>       | 2 |
| <i>WBP11P1</i>   | 2 |
| <i>WDR37</i>     | 2 |
| <i>X..10357</i>  | 2 |
| <i>X..653553</i> | 2 |



|                |   |  |
|----------------|---|--|
| <i>ZCCHC24</i> | 2 |  |
| <i>ZDHHC22</i> | 2 |  |
| <i>ZMYND11</i> | 2 |  |
| <i>ZNF248</i>  | 2 |  |
| <i>ZNF25</i>   | 2 |  |
| <i>ZNF33A</i>  | 2 |  |
| <i>ZNF638</i>  | 2 |  |
| <i>ZRANB1</i>  | 2 |  |

Table S7. The proportion of patients divided by mutation status. The mutation status information is suggested as *IDH1-TP53-ATRX-EGFR*. WT is wild-type. MT is mutation.

| WT-WT-WT-WT | MT-WT-WT-WT | MT-MT-WT-WT | MT-MT-MT-WT | WT-WT-WT-MT |
|-------------|-------------|-------------|-------------|-------------|
| 64          | 154         | 58          | 171         | 29          |
| 0.13        | 0.32        | 0.12        | 0.36        | 0.06        |

Table S8. The log-rank p-value in each four age-related mutation. OS is overall survival. PFI is progression free interval

|     | <i>IDH1</i> | <i>TP53</i> | <i>ATRX</i> | <i>EGFR</i> |
|-----|-------------|-------------|-------------|-------------|
| OS  | 2.82E-18    | 0.05141     | 0.066567    | 2.12E-14    |
| PFI | 1.10E-17    | 0.5545189   | 0.5479266   | 1.63E-19    |

Table S9. The results of multi-label feature selection information gain of *ATRX*, *TP53*, and grade

| Gene             | Clusters |  |
|------------------|----------|--|
| <i>AKIRIN1</i>   | 1        |  |
| <i>ARHGEF10L</i> | 1        |  |
| <i>ASAP3</i>     | 1        |  |
| <i>BSDC1</i>     | 1        |  |
| <i>BTF3L4</i>    | 1        |  |
| <i>C19orf2</i>   | 1        |  |
| <i>C1orf109</i>  | 1        |  |
| <i>C1orf144</i>  | 1        |  |
| <i>C1orf174</i>  | 1        |  |
| <i>C2orf67</i>   | 1        |  |
| <i>CAPZB</i>     | 1        |  |
| <i>CCDC123</i>   | 1        |  |
| <i>CCDC146</i>   | 1        |  |

|                  |   |
|------------------|---|
| <i>CDC42</i>     | 1 |
| <i>CMPK1</i>     | 1 |
| <i>CNN3</i>      | 1 |
| <i>CSDE1</i>     | 1 |
| <i>CYB561D1</i>  | 1 |
| <i>DDOST</i>     | 1 |
| <i>DDX20</i>     | 1 |
| <i>DNAJC8</i>    | 1 |
| <i>DNALI1</i>    | 1 |
| <i>DOCK7</i>     | 1 |
| <i>DR1</i>       | 1 |
| <i>EIF3I</i>     | 1 |
| <i>EVI5</i>      | 1 |
| <i>EXOSC10</i>   | 1 |
| <i>FAM54B</i>    | 1 |
| <i>FBXO42</i>    | 1 |
| <i>FOXJ3</i>     | 1 |
| <i>GDAP2</i>     | 1 |
| <i>GNAI3</i>     | 1 |
| <i>GNL2</i>      | 1 |
| <i>GPATCH1</i>   | 1 |
| <i>GPBP1L1</i>   | 1 |
| <i>GTF2B</i>     | 1 |
| <i>H6PD</i>      | 1 |
| <i>HDAC1</i>     | 1 |
| <i>HP1BP3</i>    | 1 |
| <i>HS3ST1</i>    | 1 |
| <i>INPP5B</i>    | 1 |
| <i>KDM1A</i>     | 1 |
| <i>KDM4A</i>     | 1 |
| <i>KIAA0467</i>  | 1 |
| <i>KIAA2013</i>  | 1 |
| <i>KPNA6</i>     | 1 |
| <i>LEFTY2</i>    | 1 |
| <i>LOC148189</i> | 1 |
| <i>LRRC41</i>    | 1 |
| <i>LRRC42</i>    | 1 |
| <i>LSM14A</i>    | 1 |
| <i>MFN2</i>      | 1 |
| <i>MIER1</i>     | 1 |
| <i>MIIP</i>      | 1 |

|                  |   |
|------------------|---|
| <i>MTF2</i>      | 1 |
| <i>NADK</i>      | 1 |
| <i>NFIA</i>      | 1 |
| <i>NFYC</i>      | 1 |
| <i>NRAS</i>      | 1 |
| <i>NRD1</i>      | 1 |
| <i>NSUN4</i>     | 1 |
| <i>OR4N2</i>     | 1 |
| <i>PABPC4</i>    | 1 |
| <i>PARS2</i>     | 1 |
| <i>PGD</i>       | 1 |
| <i>PHACTR4</i>   | 1 |
| <i>PHC2</i>      | 1 |
| <i>PHF13</i>     | 1 |
| <i>PKN2</i>      | 1 |
| <i>PNRC2</i>     | 1 |
| <i>PPP1R8</i>    | 1 |
| <i>PRPF38A</i>   | 1 |
| <i>psiTPTE22</i> | 1 |
| <i>PSMA5</i>     | 1 |
| <i>PSMB2</i>     | 1 |
| <i>RBBP4</i>     | 1 |
| <i>RLF</i>       | 1 |
| <i>RPAP2</i>     | 1 |
| <i>RPF1</i>      | 1 |
| <i>S100PBP</i>   | 1 |
| <i>SCP2</i>      | 1 |
| <i>SERBP1</i>    | 1 |
| <i>SF3A3</i>     | 1 |
| <i>SFRS4</i>     | 1 |
| <i>SNIP1</i>     | 1 |
| <i>SNRNP40</i>   | 1 |
| <i>SNX7</i>      | 1 |
| <i>SRRM1</i>     | 1 |
| <i>ST7L</i>      | 1 |
| <i>STX12</i>     | 1 |
| <i>TCEB3</i>     | 1 |
| <i>THRAP3</i>    | 1 |
| <i>TMEM167B</i>  | 1 |
| <i>TMEM69</i>    | 1 |
| <i>TRNAU1AP</i>  | 1 |

|                 |   |                                                                                    |
|-----------------|---|------------------------------------------------------------------------------------|
| <i>TTC4</i>     | 1 |   |
| <i>TXLNA</i>    | 1 |                                                                                    |
| <i>TXNDC12</i>  | 1 |                                                                                    |
| <i>UBA2</i>     | 1 |                                                                                    |
| <i>UBIAD1</i>   | 1 |                                                                                    |
| <i>UROD</i>     | 1 |                                                                                    |
| <i>USP48</i>    | 1 |                                                                                    |
| <i>UTP11L</i>   | 1 |                                                                                    |
| <i>VCAM1</i>    | 1 |                                                                                    |
| <i>WASF2</i>    | 1 |                                                                                    |
| <i>WDR77</i>    | 1 |                                                                                    |
| <i>WDR78</i>    | 1 |                                                                                    |
| <i>X15.Sep</i>  | 1 |                                                                                    |
| <i>YTHDF2</i>   | 1 |                                                                                    |
| <i>ZNF362</i>   | 1 |                                                                                    |
| <i>ZZZ3</i>     | 1 |                                                                                    |
| <i>C1orf230</i> | 2 |  |
| <i>C6orf138</i> | 2 |                                                                                    |
| <i>CHGB</i>     | 2 |                                                                                    |
| <i>DRAM1</i>    | 2 |                                                                                    |
| <i>DRG2</i>     | 2 |                                                                                    |
| <i>EDA2R</i>    | 2 |                                                                                    |
| <i>GRPEL2</i>   | 2 |                                                                                    |
| <i>TERT</i>     | 2 |                                                                                    |
| <i>TRIM67</i>   | 2 |                                                                                    |

Table S10. The results of multi-label feature selection information gain of *EGFR* and grade

| Gene            | Clusters |  |
|-----------------|----------|--|
| <i>ABLIM1</i>   | 1        |  |
| <i>C10orf4</i>  | 1        |  |
| <i>C5orf53</i>  | 1        |  |
| <i>CDC26</i>    | 1        |  |
| <i>CPEB3</i>    | 1        |  |
| <i>DYNC1H1</i>  | 1        |  |
| <i>EEF1A1P9</i> | 1        |  |
| <i>FAM171A1</i> | 1        |  |
| <i>FAM190B</i>  | 1        |  |
| <i>FAM71D</i>   | 1        |  |
| <i>FRY</i>      | 1        |  |
| <i>FTHL3</i>    | 1        |  |

|                  |   |
|------------------|---|
| <i>GCSH</i>      | 1 |
| <i>GUSBL1</i>    | 1 |
| <i>H3F3C</i>     | 1 |
| <i>HERC1</i>     | 1 |
| <i>HNRNPA3P1</i> | 1 |
| <i>HNRNPUL2</i>  | 1 |
| <i>KIAA0427</i>  | 1 |
| <i>KIAA0430</i>  | 1 |
| <i>KIAA1279</i>  | 1 |
| <i>LARP4B</i>    | 1 |
| <i>LOC341056</i> | 1 |
| <i>LOC442454</i> | 1 |
| <i>LOC643387</i> | 1 |
| <i>LOC644936</i> | 1 |
| <i>LOC728643</i> | 1 |
| <i>LRRC37A4</i>  | 1 |
| <i>MLLT6</i>     | 1 |
| <i>MYO18A</i>    | 1 |
| <i>NACA2</i>     | 1 |
| <i>NACAP1</i>    | 1 |
| <i>NALCN</i>     | 1 |
| <i>NUMA1</i>     | 1 |
| <i>PPIAL4C</i>   | 1 |
| <i>RICTOR</i>    | 1 |
| <i>RPL13AP3</i>  | 1 |
| <i>RPL17</i>     | 1 |
| <i>RPL23P8</i>   | 1 |
| <i>SCAPER</i>    | 1 |
| <i>SLC6A10P</i>  | 1 |
| <i>SPTAN1</i>    | 1 |
| <i>TARSL2</i>    | 1 |
| <i>TEF</i>       | 1 |
| <i>TMOD2</i>     | 1 |
| <i>TNRC6C</i>    | 1 |
| <i>TOM1L2</i>    | 1 |
| <i>TOP1P2</i>    | 1 |
| <i>TTC3</i>      | 1 |
| <i>UPF2</i>      | 1 |
| <i>WBP11P1</i>   | 1 |
| <i>X..10357</i>  | 1 |
| <i>X..653553</i> | 1 |

|                 |   |
|-----------------|---|
| <i>ZMYND11</i>  | 1 |
| <i>ZNF33A</i>   | 1 |
| <i>ZNF638</i>   | 1 |
| <i>ZRANB1</i>   | 1 |
| <i>ADAM12</i>   | 2 |
| <i>ALG3</i>     | 2 |
| <i>ANXA2P1</i>  | 2 |
| <i>ARAP3</i>    | 2 |
| <i>ASF1B</i>    | 2 |
| <i>ATP5EP2</i>  | 2 |
| <i>ATP6V1C2</i> | 2 |
| <i>AURKA</i>    | 2 |
| <i>C12orf48</i> | 2 |
| <i>C2orf28</i>  | 2 |
| <i>CALU</i>     | 2 |
| <i>CAPZA1</i>   | 2 |
| <i>CASP4</i>    | 2 |
| <i>CCDC109B</i> | 2 |
| <i>CCNB1</i>    | 2 |
| <i>CCNB2</i>    | 2 |
| <i>CCNYL1</i>   | 2 |
| <i>CD58</i>     | 2 |
| <i>CDCA8</i>    | 2 |
| <i>CDK2</i>     | 2 |
| <i>CDKN3</i>    | 2 |
| <i>CENPA</i>    | 2 |
| <i>CENPK</i>    | 2 |
| <i>CENPL</i>    | 2 |
| <i>CEP55</i>    | 2 |
| <i>CHI3L1</i>   | 2 |
| <i>CKLF</i>     | 2 |
| <i>CLIC1</i>    | 2 |
| <i>CNIH4</i>    | 2 |
| <i>COL5A2</i>   | 2 |
| <i>DDOST</i>    | 2 |
| <i>DEPDC1</i>   | 2 |
| <i>EDARADD</i>  | 2 |
| <i>EDEM2</i>    | 2 |
| <i>EMP3</i>     | 2 |
| <i>FKBP9</i>    | 2 |
| <i>FSTL1</i>    | 2 |

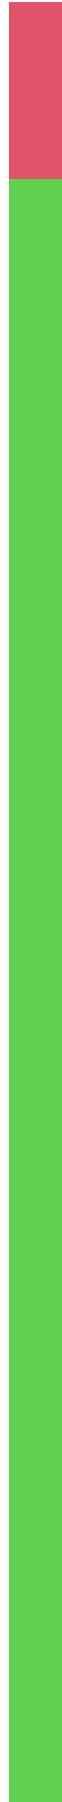

|                     |   |
|---------------------|---|
| <i>GGH</i>          | 2 |
| <i>GLA</i>          | 2 |
| <i>GLB1</i>         | 2 |
| <i>GPN1</i>         | 2 |
| <i>GPX7</i>         | 2 |
| <i>GPX8</i>         | 2 |
| <i>GUSB</i>         | 2 |
| <i>IFNGR2</i>       | 2 |
| <i>IGFBP2</i>       | 2 |
| <i>IKBIP</i>        | 2 |
| <i>KDEL2</i>        | 2 |
| <i>KPNA2</i>        | 2 |
| <i>LDHA</i>         | 2 |
| <i>LOC100130776</i> | 2 |
| <i>LOC407835</i>    | 2 |
| <i>LOC541471</i>    | 2 |
| <i>LOX</i>          | 2 |
| <i>LYPLA1</i>       | 2 |
| <i>MED8</i>         | 2 |
| <i>MLX</i>          | 2 |
| <i>NCRNA00152</i>   | 2 |
| <i>NNMT</i>         | 2 |
| <i>NOX4</i>         | 2 |
| <i>NUP37</i>        | 2 |
| <i>OSTC</i>         | 2 |
| <i>PA2G4P4</i>      | 2 |
| <i>PCNA</i>         | 2 |
| <i>PDPN</i>         | 2 |
| <i>PLA2G2A</i>      | 2 |
| <i>PLEK2</i>        | 2 |
| <i>PMS2L2</i>       | 2 |
| <i>PPIA</i>         | 2 |
| <i>PPIL5</i>        | 2 |
| <i>PRDX4</i>        | 2 |
| <i>PSMC2</i>        | 2 |
| <i>PTTG1</i>        | 2 |
| <i>RAB32</i>        | 2 |
| <i>RAB42</i>        | 2 |
| <i>RAP1B</i>        | 2 |
| <i>RPA3</i>         | 2 |
| <i>SEC61G</i>       | 2 |

|                 |   |  |
|-----------------|---|--|
| <i>SERPINH1</i> | 2 |  |
| <i>SHOX2</i>    | 2 |  |
| <i>SHQ1</i>     | 2 |  |
| <i>SLC43A3</i>  | 2 |  |
| <i>SMC4</i>     | 2 |  |
| <i>SUMO1P3</i>  | 2 |  |
| <i>TAGLN2</i>   | 2 |  |
| <i>TBL2</i>     | 2 |  |
| <i>TGIF1</i>    | 2 |  |
| <i>TIMP1</i>    | 2 |  |
| <i>TMEM106C</i> | 2 |  |
| <i>TMSL3</i>    | 2 |  |
| <i>TNFAIP6</i>  | 2 |  |
| <i>TPM4</i>     | 2 |  |
| <i>TUBA1C</i>   | 2 |  |
| <i>UBE2A</i>    | 2 |  |
| <i>UBE2MP1</i>  | 2 |  |
| <i>WEE1</i>     | 2 |  |
| <i>ZCCHC9</i>   | 2 |  |
| <i>ZNF90</i>    | 2 |  |

---
